# Supplementary material
Source: PubMed Central journal article supplement (PMC7300646)
Supplement: COD-83-422-s001.pdf [file COD-83-422-s001.pdf]

## Online supplemental Tables

**Online supplemental Table 1a.** The description of the overall demographics and the comparison of demographical parameters between groups. Categorical variables were compared using chi square test and non-parametric continuous variables were compared using Mann Whitney U test.  $P < .05$  was accepted as statistical significant.

NA: not applicable

| Demographic features                                   | Total number of patients (n=107) | Patients with hand eczema (n=54) | Patients without hand eczema (n=53) | P-value |
|--------------------------------------------------------|----------------------------------|----------------------------------|-------------------------------------|---------|
| Patients with hand eczema, n (%)                       | 54 (50.5)                        | 54 (100)                         | 0 (0)                               | NA      |
| Gender                                                 |                                  |                                  |                                     | .033    |
| Male, n (%)                                            | 35 (32.7)                        | 12 (22.2)                        | 23 (43.4)                           |         |
| Female, n (%)                                          | 72 (67.3)                        | 42 (77.8)                        | 30 (56.6)                           |         |
| Age, median (range)                                    | 28 (21-48)                       | 29 (21-46)                       | 27 (21-48)                          | .003    |
| Mean                                                   | 29.6±6.3                         | 30.5±5.7                         | 28.6±6.8                            |         |
| Profession                                             |                                  |                                  |                                     | .41     |
| Physician, n (%)                                       | 47 (43.9)                        | 24 (44.4)                        | 23 (43.4)                           |         |
| Nurse, n (%)                                           | 48 (44.9)                        | 23 (42.6)                        | 25 (47.2)                           |         |
| Medical caretaker, n (%)                               | 2 (1.9)                          | 2 (3.7)                          | 0 (0)                               |         |
| Other, n (%)                                           | 10 (9.3)                         | 5 (9.3)                          | 5 (9.4)                             |         |
| Workplace                                              |                                  |                                  |                                     | .028    |
| Inpatient clinic, n (%)                                | 93 (86.9)                        | 45 (83.3)                        | 48 (90.6)                           |         |
| Intensive care unit, n (%)                             | 5 (4.7)                          | 5 (9.3)                          | 0 (0)                               |         |
| Emergency unit, n (%)                                  | 9 (8.4)                          | 4 (7.4)                          | 5 (9.4)                             |         |
| Work years, median (range)                             | 3 (0.5-29)                       | 5 (0.5-25)                       | 2 (0.5-29)                          | <.001   |
| Weekly work hours, median (range)                      | 45 (24-80)                       | 42.5 (24-80)                     | 45 (24-80)                          | .44     |
| Length of stay at COVID-19 units (day), median (range) | 45 (7-90)                        | 50 (10-70)                       | 42 (7-90)                           | .99     |
| History of personal atopy, n (%)                       | 42 (39.3)                        | 25 (46.3)                        | 17 (32.1)                           | .19     |
| Atopic dermatitis and/or atopic skin, n (%)            | 32 (29.9)                        | 19 (35.2)                        | 13 (24.5)                           | .32     |
| History of familial atopy, n (%)                       | 25 (23.4)                        | 15 (27.8)                        | 10 (18.9)                           | .39     |
| History of metal allergy, n (%)                        | 16 (15.0)                        | 11 (20.4)                        | 5 (9.4)                             | .19     |
| History of glove allergy (Type 4), n (%)               | 13 (12.1)                        | 6 (11.1)                         | 7 (13.2)                            | .97     |
| Generalized dry skin, n (%)                            | 39 (36.4)                        | 27 (50.0)                        | 12 (22.6)                           | .006    |
| History of hand eczema in the past year, n (%)         | 32 (29.9)                        | 29 (53.7)                        | 3 (5.7)                             | <.001   |
| Additional housework at home, n (%)                    | 58 (54.2)                        | 41 (75.9)                        | 17 (32.1)                           | <.001   |
| Smoking status                                         |                                  |                                  |                                     | .94     |
| Nonsmoker, n (%)                                       | 68 (63.6)                        | 35 (64.8)                        | 33 (62.3)                           |         |
| Smoker (current or ex-smoker), n (%)                   | 39 (36.4)                        | 19 (35.2)                        | 20 (37.7)                           |         |

**Online supplemental Table 1b.** The descriptives of hand hygiene practices of the study population at workplace and at daily life and the comparison of two groups. Categorical variables were compared using chi square.  $P < .05$  was accepted as statistically significant.

NA: not applicable

| Hand hygiene practices                                     | Total number of patients (n=107) | Patients with hand eczema (n=54) | Patients without hand eczema (n=53) | P-value |
|------------------------------------------------------------|----------------------------------|----------------------------------|-------------------------------------|---------|
| <b>At workplace</b>                                        |                                  |                                  |                                     |         |
| Frequency of hand washing                                  |                                  |                                  |                                     | .023    |
| <5 times a shift, n (%)                                    | 5 (4.7)                          | 3 (5.6)                          | 2 (3.8)                             |         |
| 5-10 times a shift, n (%)                                  | 9 (8.4)                          | 1 (1.9)                          | 8 (15.1)                            |         |
| 11-20 times a shift, n (%)                                 | 29 (27.1)                        | 12 (22.2)                        | 17 (32.1)                           |         |
| >20 times a shift, n (%)                                   | 64 (59.8)                        | 38 (70.4)                        | 26 (49.1)                           |         |
| Frequency of use of alcohol-based disinfectant             |                                  |                                  |                                     | .84     |
| <5 times a shift, n (%)                                    | 11 (10.3)                        | 5 (9.3)                          | 6 (11.3)                            |         |
| 5-10 times a shift, n (%)                                  | 27 (25.2)                        | 13 (24.1)                        | 14 (26.4)                           |         |
| 11-20 times a shift, n (%)                                 | 24 (22.4)                        | 11 (20.4)                        | 13 (24.5)                           |         |
| >20 times a shift, n (%)                                   | 45 (42.1)                        | 25 (46.3)                        | 20 (37.7)                           |         |
| Frequency of glove use                                     |                                  |                                  |                                     | .13     |
| <5 times a shift, n (%)                                    | 9 (8.4)                          | 4 (7.4)                          | 5 (9.4)                             |         |
| 5-10 times a shift, n (%)                                  | 12 (11.2)                        | 3 (5.6)                          | 9 (17.0)                            |         |
| 11-20 times a shift, n (%)                                 | 26 (24.3)                        | 17 (31.5)                        | 9 (17.0)                            |         |
| >20 times a shift, n (%)                                   | 60 (56.1)                        | 30 (55.6)                        | 30 (56.6)                           |         |
| Frequency of use of moisturizing creams after hand washing |                                  |                                  |                                     | .002    |
| Never, n (%)                                               | 31 (29.9)                        | 9 (16.7)                         | 22 (41.5)                           |         |
| <50%, n (%)                                                | 45 (42.1)                        | 21 (38.9)                        | 24 (45.3)                           |         |
| 50%, n (%)                                                 | 21 (19.6)                        | 16 (29.6)                        | 5 (9.4)                             |         |
| >50%, n (%)                                                | 7 (6.5)                          | 5 (9.3)                          | 2 (3.8)                             |         |
| Always, n (%)                                              | 3 (2.8)                          | 3 (5.6)                          | 0 (0)                               |         |
| <b>At daily life</b>                                       |                                  |                                  |                                     |         |
| Frequency of hand washing                                  |                                  |                                  |                                     | .088    |
| <5 times a day, n (%)                                      | 6 (5.6)                          | 1 (1.9)                          | 5 (9.4)                             |         |
| 5-10 times a day, n (%)                                    | 35 (32.7)                        | 14 (25.9)                        | 21 (39.6)                           |         |
| 11-20 times a day, n (%)                                   | 45 (42.1)                        | 27 (50.0)                        | 18 (34.0)                           |         |
| >20 times a day, n (%)                                     | 21 (19.6)                        | 12 (22.2)                        | 9 (17.0)                            |         |
| Frequency of use of alcohol-based disinfectant             |                                  |                                  |                                     | .11     |
| <5 times a day, n (%)                                      | 86 (80.4)                        | 45 (83.3)                        | 41 (77.4)                           |         |
| 5-10 times a day, n (%)                                    | 14 (13.1)                        | 9 (16.7)                         | 5 (9.4)                             |         |
| 11-20 times a day, n (%)                                   | 5 (4.7)                          | 0 (0)                            | 5 (9.4)                             |         |
| >20 times a day, n (%)                                     | 2 (1.9)                          | 0 (0)                            | 2 (3.8)                             |         |

|                                                                                        |           |           |           |       |
|----------------------------------------------------------------------------------------|-----------|-----------|-----------|-------|
| Frequency of use of moisturizing creams after hand washing                             |           |           |           | <.001 |
| Never, n (%)                                                                           | 46 (43.0) | 6 (11.1)  | 40 (75.5) |       |
| <50%, n (%)                                                                            | 33 (30.8) | 23 (42.6) | 10 (18.9) |       |
| 50%, n (%)                                                                             | 16 (15.0) | 15 (27.8) | 1 (1.9)   |       |
| >50%, n (%)                                                                            | 5 (4.7)   | 4 (7.4)   | 1 (1.9)   |       |
| Always, n (%)                                                                          | 7 (6.5)   | 6 (11.1)  | 1 (1.9)   |       |
| <b>Preventive and therapeutic measures in patients with hand eczema (n=45)</b>         |           |           |           |       |
| Use of moisturizing creams before the development of hand eczema, n(%)                 |           |           |           |       |
| Yes                                                                                    | 26 (57.8) | 26 (57.8) | NA        | NA    |
| No                                                                                     | 19 (42.2) | 19 (42.2) | NA        |       |
| Frequency of use of moisturizing creams after the development of hand eczema, n(%)     |           |           |           |       |
| More frequent                                                                          | 36 (80)   | 36 (80)   | NA        | NA    |
| Not changed                                                                            | 8 (17.8)  | 8 (17.8)  | NA        |       |
| Less frequent                                                                          | 1 (2.2)   | 1 (2.2)   | NA        |       |
| Frequency of handwashing and use of alcohol-based disinfectant after hand eczema, n(%) |           |           |           |       |
| More frequent                                                                          | 4 (8.9)   | 4 (8.9)   | NA        | NA    |
| Not changed                                                                            | 28 (62.2) | 28 (62.2) | NA        |       |
| Less frequent                                                                          | 13 (28.9) | 13 (28.9) | NA        |       |
| Use of topical corticosteroid for hand eczema treatment, n(%)                          |           |           |           |       |
| Yes                                                                                    | 16 (35.6) | 16 (35.6) | NA        | NA    |
| No                                                                                     | 29 (64.4) | 29 (64.4) | NA        |       |

**Online supplemental Table 2.** Multivariate analysis for identifying independent risk factors associated with hand eczema. Logistic regression analysis was used to define independent risk factors. OR: Odds ratio, 95%CI: 95% confidence interval.

| <b>Variables</b>                             | <b><i>P</i>-value</b> | <b>OR</b> | <b>95%CI</b> |
|----------------------------------------------|-----------------------|-----------|--------------|
| Female gender                                | .89                   | 0.90      | 0.20-4.12    |
| Age >28                                      | .11                   | 2.68      | 0.80-8.93    |
| Working years >3                             | .62                   | 1.46      | 0.33-6.48    |
| Generalized dry skin                         | .91                   | 1.10      | 0.24-4.92    |
| Hand washing >20 per day at work             | .051                  | 3.28      | 0.995-10.8   |
| Use of moisturizing hand cream at work       | .18                   | 2.49      | 0.66-9.30    |
| Use of moisturizing hand cream at daily life | <.001                 | 22.1      | 6.33-77.0    |
| Houseworking                                 | .75                   | 1.26      | 0.31-5.15    |
| History of hand eczema in the past year      | <.001                 | 18.5      | 3.82-89.9    |

**Online supplemental Table 3.** Clinical characteristics of hand eczema

According to patient's history of a confirmed diagnosis by patch testing in the past

HECSI: Hand eczema severity index

§HECSI 0-11 points: mild eczema, 12-27 points: moderate eczema, >27 points: severe eczema

| <b>Clinical features</b>                                    | <b>n=54</b> |
|-------------------------------------------------------------|-------------|
| One hand, n (%)                                             | 2 (3.7)     |
| Both hand, n (%)                                            | 52 (96.3)   |
| Clinical type                                               |             |
| Irritant contact dermatitis, n (%)                          | 52 (96.3)   |
| <input type="checkbox"/> Allergic contact dermatitis, n (%) | 2 (3.7)     |
| Morphology                                                  |             |
| Dyshidrotic/vesicular, n (%)                                | 3 (5.6)     |
| Erythema-squamatus, n (%)                                   | 41 (75.9)   |
| Hyperkeratotic/rhagadiform, n (%)                           | 7 (12.9)    |
| Combined morphology, n (%)                                  | 3 (5.6)     |
| Localizations                                               |             |
| Palm, n (%)                                                 | 11 (20.4)   |
| Dorsum, n (%)                                               | 46 (85.2)   |
| Finger webs, n (%)                                          | 10 (18.5)   |
| Sides of finger, n (%)                                      | 4 (7.4)     |
| Fingertips, n (%)                                           | 8 (14.8)    |
| Hand and wrist, n (%)                                       | 4 (7.4)     |
| Periungual eczema and nail eczema, n (%)                    | 2 (3.7)     |
| Pruritus, n (%)                                             | 39 (72.2)   |
| HECSI, median (range)                                       | 24 (3-84)   |
| §Eczema severity                                            |             |
| Mild, n (%)                                                 | 13 (24.1)   |
| Moderate, n (%)                                             | 20 (37.0)   |
| Severe, n (%)                                               | 21 (38.9)   |
